# Supplementary material for: Hiding Behind the Curtain: Performance Information and Public Officials’ Policy Instrument Preferences in Visible and Invisible Domains
Source: Research Square preprint supplement (doi:10.21203/rs.3.rs-5448023/v1), 2025-04-24
Supplement: Supplementary file 1 [file dd5d5323662ccb43f768d152.docx]

**Appendix**

**Questionnaire (Translated English version)**

**Informed Consent Form for Experimental Participants**

**Public officials’ Preferences for Policy Instruments Programs**

**Research purpose:** We are a project team at the (Authors’ affiliation). You are volunteering to participate in a study on public officials’ preferences for policy instruments. We hope you will agree to participate in this study.

**Procedure:** This questionnaire will present you with information about an urban infrastructure development program of a fictitious city government. You will then be asked to answer some questions based on the above information, such as which policy instruments you will choose to improve performance. This questionnaire lasts about 5 to 10 minutes. Please read the questions in the questionnaire and answer them according to your actual situation.

**Costs:** You will not be charged any fees for this study.

**Potential risks and side effects:** This study has no potential risks or side effects.

**Confidentiality:** These results of the research may be published in academic journals/books or used for teaching purposes. However, your name or other information that identifies you will not appear in any published or teaching materials unless you give your permission.

**Study termination:** Participation is entirely voluntary, and you may request to withdraw from the experiment at any point in the process, and you will not be penalized or penalized for withdrawing from the experiment.

If you have any questions about this research project, please feel free to contact me at (Author’s information). Questions or concerns about your rights as a research participant should be directed to the Institutional Review Board (IRB) of (Authors’ affiliation) at (information about authors’ affiliation).

Thank you for participating in this study.

(Principal Investigator and Authors’ affiliation)

**Do you agree to participate in the survey?**

- YES (Continue this survey)
- NO (End of this survey)

**Demographics**

Are you male or female?

- Male
- Female

What is your age?

- 30 years and below
- 31 to 40 years
- 41 to 50 years
- 51 years and above

What is the highest degree you have received?

- High school and below
- Bachelor’s degree
- Postgraduate

What is your position type?

- Management
- Technology
- Enforcement

**Vignette**

**Introductory Statement (all conditions)**

Currently, government departments at all levels are commonly included in performance measurement systems. The types of policy instruments that are used have a significant effect on the achievement of performance goals. By policy instruments, we refer to the tools that government departments use to achieve their policy goals. For example, the Bureau of Ecology and Environment may use legal tools to ban pollutant emissions to achieve the goal of a good air index.

Next, you will read brief descriptions of a virtual N-city, which is a medium-sized city in central China with a growing population. Please read the description of N-city carefully and answer the questions that follow.

**The N-city’s Infrastructure Development**

Imagine a situation in which the central government issues a ‘Three-Year Action Plan’ (2020–2022) for the development of urban infrastructure in China, calling on local governments to use policy instruments to enhance the construction of **urban roads**.

According to an independent third-party report, in the first year of action (2020), N-city’s performance regarding the length of new **urban roads** ranks **the highest third (best performing)** of similar cities (in terms of size, population, economy, etc.).

**The N-city’s Infrastructure Development**

Imagine a situation in which the central government issues a ‘Three-Year Action Plan’ (2020–2022) for the development of urban infrastructure in China, calling on local governments to use policy instruments to enhance the construction of **urban roads**.

According to an independent third-party report, in the first year of action (2020), N-city’s performance regarding the length of new **urban roads** ranks in **the middle third** of similar cities (in terms of size, population, economy, etc.).

**The N-city’s Infrastructure Development**

Imagine a situation in which the central government issues a ‘Three-Year Action Plan’ (2020–2022) for the development of urban infrastructure in China, calling on local governments to use policy instruments to enhance the construction of **urban roads**.

According to an independent third-party report, in the first year of action (2020), N-city’s performance regarding the length of new **urban roads** ranks **the lowest third (worst performing)** of similar cities (in terms of size, population, economy, etc.).

**The N-city’s Infrastructure Development**

Imagine a situation in which the central government issues a ‘Three-Year Action Plan’ (2020–2022) for the development of urban infrastructure in China, calling on local governments to use policy instruments to enhance the construction of **underground** **sewage pipes**.

According to an independent third-party report, in the first year of action (2020), N-city’s performance regarding the length of new **underground sewage pipes** ranks **the highest third (best performing)** of similar cities (in terms of size, population, economy, etc.).

**The N-city’s Infrastructure Development**

Imagine a situation in which the central government issues a ‘Three-Year Action Plan’ (2020–2022) for the development of urban infrastructure in China, calling on local governments to use policy instruments to enhance the construction of **underground sewage pipes**.

According to an independent third-party report, in the first year of action (2020), N-city’s performance regarding the length of new **underground sewage pipes** ranks in **the middle third** of similar cities (in terms of size, population, economy, etc.).

**The N-city’s Infrastructure Development**

Imagine a situation in which the central government issues a ‘Three-Year Action Plan’ (2020–2022) for the development of urban infrastructure in China, calling on local governments to use policy instruments to enhance the construction of **underground sewage pipes**.

According to an independent third-party report, in the first year of action (2020), N-city’s performance regarding the length of new **underground sewage pipes** ranks **the lowest third (worst performing)** of similar cities (in terms of size, population, economy, etc.).

**Question 1:** Based on the above description, imagine that you are the manager of the N-city municipality, what do you think are the two most effective policy instruments to improve the performance goals of N-city in 2021?

- Regulation (e.g., enactment of laws, regulations)
- Administrative Guidance (e.g., providing advice and counseling)
- Report and Reward Projects (e.g., the reward for key projects)
- Technology Consultant and Education Training (e.g., providing technical and educational training services)
- Subsidy (e.g., financial support for private sectors to provide public services)
- Charges (e.g., charging users of public services)
- Administrative Special Permission (e.g., authorizing private sectors to provide public services)
- Tax Reduction (e.g., tax reductions or tax penalties)
- Direct Production of Public Goods (e.g., direct provision of public services using financial resources)
- Information Provision (e.g., provision of information to third-party institutions)
- Other

Based on your answers to the previous question, to what extent do you agree or disagree with the following statements:

**Statement 1:** These two policy instruments were chosen because they are effective instruments that are more likely to achieve specific policy objectives.

- Completely disagree
- Disagree
- Neither disagree nor agree
- Agree
- Strongly agree

**Statement 2:** These two policy instruments were chosen because they are legitimate instruments that are more likely to be recognized by leaders, colleagues, and policy experts.

- Completely disagree
- Disagree
- Neither disagree nor agree
- Agree
- Strongly agree

**Table A1.** Sample descriptive by experimental group

|  | Overall sample | | | | Visible public goods group | | | | Invisible public goods group | | | |
| --- | --- | --- | --- | --- | --- | --- | --- | --- | --- | --- | --- | --- |
|  | Mean | SD | Min | Max | Mean | SD | Min | Max | Mean | SD | Min | Max |
| Gender (female =1) | 0.46 | 0.50 | 0 | 1 | 0.46 | 0.50 | 0 | 1 | 0.46 | 0.50 | 0 | 1 |
| Age | 1.73 | 0.73 | 1 | 4 | 1.75 | 0.74 | 1 | 4 | 1.70 | 0.73 | 1 | 4 |
| Education | 1.20 | 0.43 | 1 | 3 | 1.20 | 0.43 | 1 | 3 | 1.20 | 0.44 | 1 | 3 |
| Position type | 1.61 | 0.70 | 1 | 3 | 1.60 | 0.71 | 1 | 3 | 1.62 | 0.70 | 1 | 3 |
| Job stress | 3.09 | 1.15 | 1 | 5 | 2.24 | 0.89 | 1 | 5 | 2.26 | 0.89 | 1 | 5 |
| Job satisfaction | 3.96 | 0.73 | 1 | 5 | 3.91 | 0.70 | 1.25 | 5 | 3.91 | 0.67 | 1.5 | 5 |
| PSM | 3.82 | 0.54 | 1.88 | 4.97 | 3.85 | 0.51 | 2.14 | 4.97 | 3.79 | 0.57 | 1.88 | 4.97 |
| Policy instrument preference | 2.23 | 0.70 | 1 | 3 | 2.28 | 0.64 | 1 | 3 | 2.17 | 0.74 | 1 | 3 |
| Effectiveness | 3.77 | 0.89 | 1 | 5 | 3.90 | 0.87 | 1 | 5 | 3.63 | 0.89 | 1 | 5 |
| Legitimacy | 4.00 | 0.60 | 2 | 5 | 3.95 | 0.64 | 2 | 5 | 4.04 | 0.55 | 2 | 5 |
| *N* | 1,171 | 1,171 | 1,171 | 1,171 | 586 | 586 | 586 | 586 | 585 | 585 | 585 | 585 |

**Table A2.** Outcomes’ descriptive statistic (*N* = 1,171).

|  | Visible public goods  (*n* = 585) | | | | Invisible public goods  (*n* = 586) | | | |
| --- | --- | --- | --- | --- | --- | --- | --- | --- |
| Mean | SD | Min | Max | Mean | SD | Min | Max |
| Preference for policy instruments (index) | 2.28 | 0.64 | 1 | 3 | 2.18 | 0.74 | 1 | 3 |
| Evaluation of effectiveness | 3.90 | 0.87 | 1 | 5 | 3.63 | 0.89 | 1 | 5 |
| Evaluation of legitimacy | 3.95 | 0.64 | 2 | 5 | 4.06 | 0.56 | 2 | 5 |

**Table A3.** The effect of positive and negative performance information on public officials’ preferences for policy instruments across invisible public goods treatment groups, ordered logistic regression.

|  | B | SE | *p* | OR | 95% CI |
| --- | --- | --- | --- | --- | --- |
| Treatment (Ref. Neutral PI) |  |  |  |  |  |
| Positive PI | -0.273 | 0.190 | 0.151 | 0.761 | [0.525, 1.105] |
| Negative PI | -0.152 | 0.187 | 0.417 | 0.859 | [0.595, 1.240] |

*Note:* The reference category for the performance variable is neutral performance information. PI = performance information.

**Table A4.** Independent samples t-test across visible and invisible public goods groups.

| Treatment group | Mean | SE | 95% CI | *t* | *p* |
| --- | --- | --- | --- | --- | --- |
| Positive PI |  |  |  |  |  |
| Visible (*n* = 197) | 2.34 | 0.044 | [2.252, 2.428] | 3.097 | 0.001*** |
| Invisible (*n* = 192) | 2.12 | 0.056 | [2.010, 2.230] |
| Neutral PI |  |  |  |  |  |
| Visible (*n* = 194) | 2.18 | 0.052 | [2.080, 2.271] | 0.821 | 0.794 |
| Invisible (*n* = 197) | 2.23 | 0.048 | [2.132, 2.335] |
| Negative PI |  |  |  |  |  |
| Visible (*n* = 195) | 2.31 | 0.045 | [2.224, 2.401] | 2.025 | 0.022* |
| Invisible (*n* = 196) | 2.17 | 0.052 | [2.071, 2.276] |

*Note:* **p* <.05, ***p* <.01, ****p* <.001.

**Table A5.** Evaluation of the effectiveness and legitimacy features of chosen policy instruments, ordinary least squares regression.

|  | Visible public goods | | Invisible public goods | |
| --- | --- | --- | --- | --- |
|  | Effectiveness  (Model 1) | Legitimacy  (Model 2) | Effectiveness  (Model 3) | Legitimacy  (Model 4) |
| Treatment (Ref. Neutral PI) |  |  |  |  |
| Positive PI | 0.067  (0.085) | 0.036  (0.063) | 0.035  (0.091) | 0.156**  (0.056) |
| Negative PI | -0.076  (0.092) | -0.025  (0.067) | 0.268**  (0.088) | 0.005  (0.056) |
| Constant | 3.902***  (0.064) | 3.948***  (0.047) | 3.533***  (0.063) | 4.005***  (0.038) |
| *N* | 586 | 586 | 585 | 585 |
| *R2* | 0.005 | 0.002 | 0.018 | 0.017 |

*Note:* Entries are regression coefficients. The reference category for the performance variable is neutral performance. Robust SE in parentheses. **p* <.05, ***p* <.01, ****p* <.001.


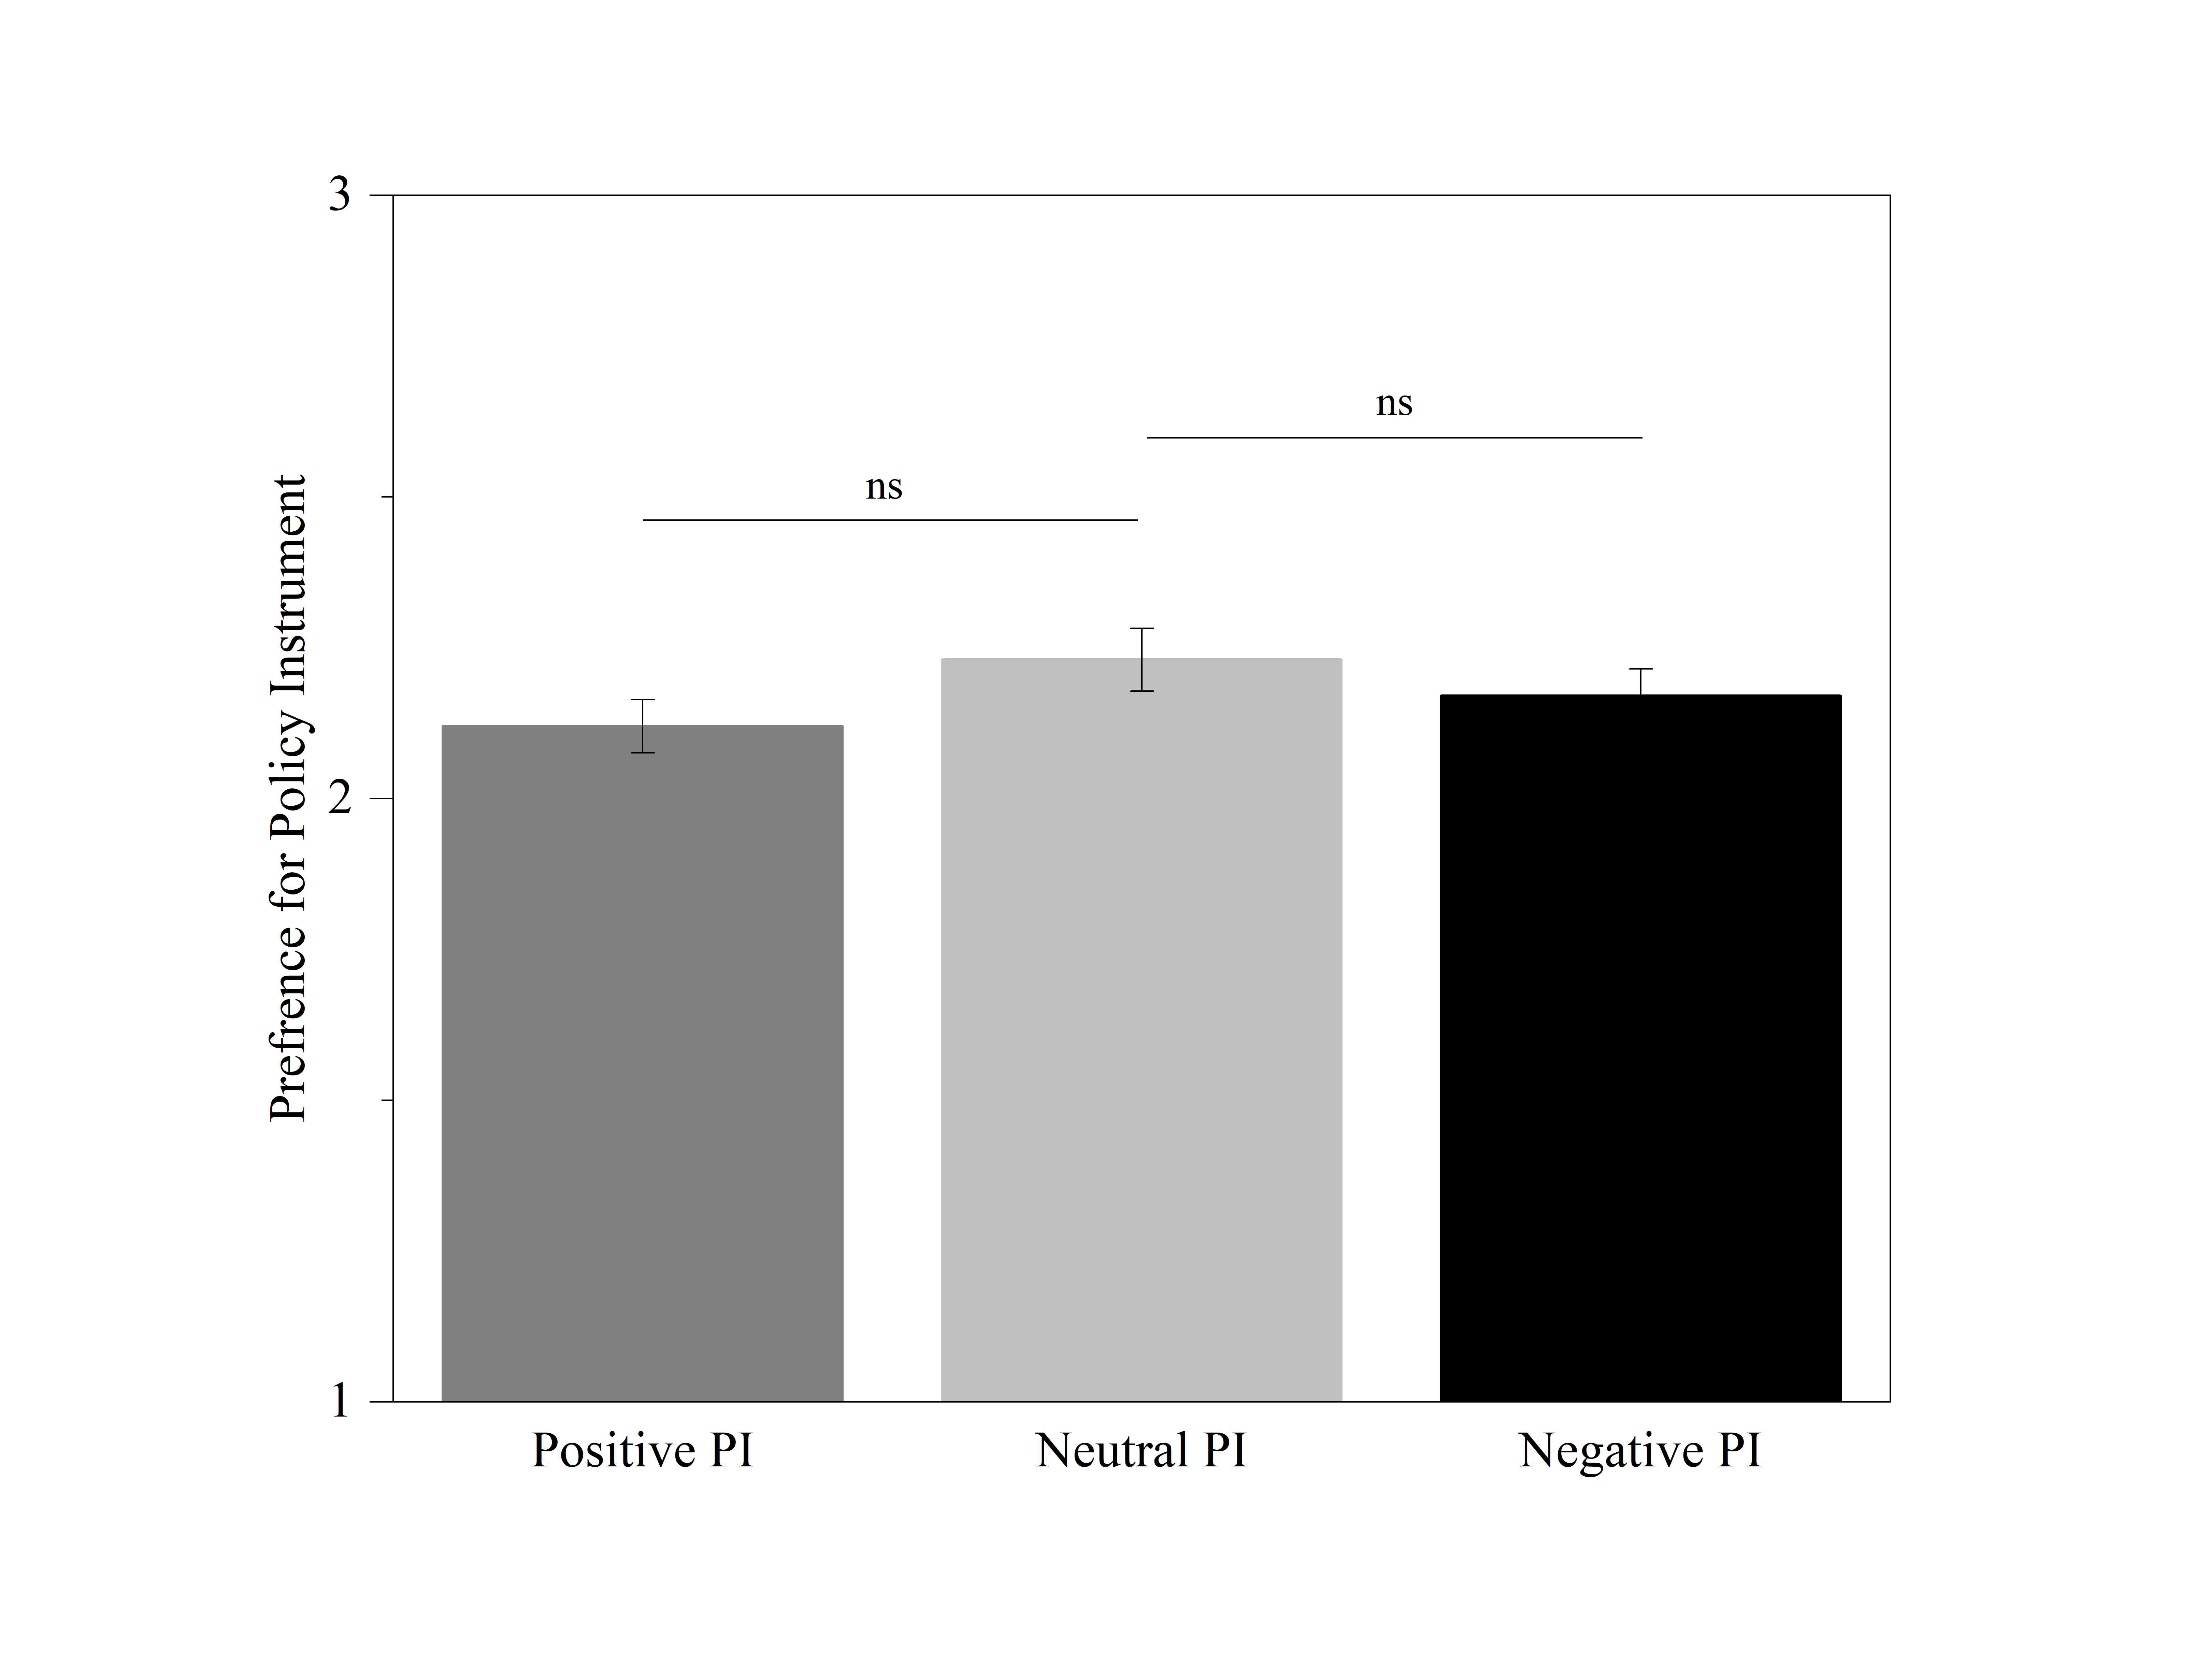


**Figure A1.** Public officials’ preferences for policy instruments in the invisible public goods domain by performance group (positive, neutral, and negative), PI = performance information. *Note:* the asterisks on the straight line show significant differences between treatment effects (*p*-Values from t-test, **p* <.05, ***p* <.01, ****p* <.001). Confidence intervals for the individual effects are at 95%.
